# Supplementary material for: Interface prompted highly efficient hydrogen evolution of MoS2/CoS2heterostructures in a wide pH range
Source: Royal Society of Chemistry journal article supplement (doi:10.1039/d3cp01011b), 2023-01-01
Supplement: d3cp01011b1.pdf [file d3cp01011b1.pdf]

## Supporting Information for

### Interface prompted highly efficient hydrogen evolution of MoS<sub>2</sub>/CoS<sub>2</sub> heterostructures in wide pH range

Tian Wang,<sup>1</sup> Pu Chang,<sup>2</sup> Zhipeng Sun,<sup>1</sup> Xiaohu Wang,<sup>3</sup> Janguang Tao<sup>2,\*</sup> and Lixiu Guan<sup>1,\*</sup>

<sup>1</sup>School of Science, Hebei University of Technology, Tianjin 300401, China

<sup>2</sup>School of Materials Science and Engineering, Hebei University of Technology, Tianjin  
300132, China

<sup>3</sup>Ulanqab Key Laboratory of graphite (graphene) new materials, Rising Graphite Applied  
Technology Research Institute, Ulanqab, Inner Mongolia, 013650, China

#### Material Synthesis:

**Synthesis of MoS<sub>2</sub>/CoS<sub>2</sub> heterostructure on carbon cloth (CC):** CC was immersed in acetone, ethanol and deionized (DI) water for ultrasonically cleaning of 30 min in each step. At first, 0.55 g Co(NO<sub>3</sub>)<sub>2</sub>·6H<sub>2</sub>O and 1.30 g 2-methylimidazole (C<sub>4</sub>H<sub>6</sub>N<sub>2</sub>) were uniformly dissolved in 40 mL water, respectively. Subsequently, a piece of treated CC (2×3 cm<sup>2</sup>) was immersed in a mixed purple solution consisting of the above two solutions at room temperature for 5 h. The purple CC at the end of the reaction was repeatedly rinsed with ethanol and dried overnight to obtain cobalt-based metal-organic framework on CC (Co-MOF/CC).

Secondly, the prepared Co-MOF/CC was immersed into a 50 mL (ethanol: DI water = 3:2) solution containing 0.91 g sodium molybdate (Na<sub>2</sub>MoO<sub>4</sub>) and etched at 100 °C for 3 h. After etching, the samples were washed by ethanol and dried overnight to obtain CoMoO<sub>4</sub>/CC.

At last, the MoS<sub>2</sub>/CoS<sub>2</sub> heterostructure was prepared by simple one-

step calcination at 400 °C for 5 h under Ar atmosphere, where 1 g thiourea powder and CoMoO<sub>4</sub>/CC precursors were placed in the upstream and downstream of the tube furnace, respectively. The mass loading of MoS<sub>2</sub>/CoS<sub>2</sub> on CC was calculated to be ~2.05 mg cm<sup>-2</sup>.

*Synthesis of CoS<sub>2</sub> on CC:* The conditions remained the same except for the replacement of 0.91 g sodium molybdate with 0.69 g of Co(NO<sub>3</sub>)<sub>2</sub>·6H<sub>2</sub>O in the preparation of CoMoO<sub>4</sub> step. The mass loading of CoS<sub>2</sub> on CC was calculated to be ~1.97 mg cm<sup>-2</sup>.

***Synthesis of MoS<sub>2</sub> on CC:*** The MoS<sub>2</sub> was prepared on CC using a simple hydrothermal method. A piece of treated CC (2×3 cm<sup>2</sup>) substrate was immersed in 40 mL aqueous solution composed of 0.25 g Na<sub>2</sub>MoO<sub>4</sub> and 0.5 g TAA. Subsequently, the solution was transferred into a 50 mL Teflon-lined stainless autoclave and heated to 200 °C for 20 h. The prepared sample was washed with ethanol and dried at 60 °C to obtain the MoS<sub>2</sub> on CC. The mass loading of MoS<sub>2</sub> on CC was calculated to be ~2.08 mg cm<sup>-2</sup>.

***Preparation of Pt/C on CC:*** The commercial Pt/C (20 wt %, Aladdin) and IrO<sub>2</sub> (99%, Aladdin) was drop-casted on CC using catalyst ink. The catalyst ink was obtained by dispersing Pt/C uniformly in a solution containing 0.5 mL ethanol and 50 µL Nafion. The mass loading of Pt/C was calculated to be ~2.0 mg cm<sup>-2</sup>.

**Electrochemical measurements:** The electrochemical performance was tested with a three-electrode configuration using LK2010A

electrochemical workstation (Tianjin, China). Nitrogen saturated solutions of 0.5 M H<sub>2</sub>SO<sub>4</sub> and 1.0 M KOH were used as acidic and alkaline electrolytes, respectively. The saturated calomel electrode (SCE) and Ag/AgCl were used as the reference electrode in 1 M KOH and 0.5 M H<sub>2</sub>SO<sub>4</sub>, respectively. The obtained catalysts on carbon cloth (CC) and a graphite rod were directly used as the working electrode and the counter electrode, respectively. The linear sweep voltammetry (LSV) curves were performed at a scan rate of 5 mV s<sup>-1</sup> with *iR* compensation. The electrochemical impedance spectroscopy (EIS) measurements were carried out to obtain the  $R_{ct}$  in the frequency range of 100 kHz ~ 0.01 Hz with AC amplitude of 5 mV at the overpotential of 100 mV.

**Electrochemical active surface area (ECSA) calculation:** The double layer capacitance ( $C_{dl}$ ) was evaluated according to the following equation:  $C_{dl} = \Delta j / 2\nu$ , where  $\Delta j$  is the current density difference between anode and cathode at the potential corresponding to 0.520 V and  $\nu$  is the scan rate (Fig. S8). Subsequently, the ECSA was estimated from the  $C_{dl}$  according to  $ECSA = C_{dl} / C_s$ , which  $C_s$  is the specific capacitance.

Table S1.  $\Delta G_H^*$  values for various site on 2H-MoS<sub>2</sub>, CoS<sub>2</sub> and 2H-MoS<sub>2</sub>/CoS<sub>2</sub>.

| Site                    | Gibbs free energy $\Delta G_H^*$ (eV) |          |
|-------------------------|---------------------------------------|----------|
|                         | Acidic                                | Alkaline |
| 2H-MoS <sub>2</sub> -Mo | 2.38                                  | 3.97     |
| 2H-MoS <sub>2</sub> -S  | 2.01                                  | 4.43     |
| CoS <sub>2</sub> -S     | -4.10                                 | -6.64    |
| CoS <sub>2</sub> -Co    | 0.36                                  | 0.61     |
| HS-Co                   | -0.08                                 | -0.25    |
| HS-Mo                   | 0.39                                  | 0.48     |
| HS-S(MoS <sub>2</sub> ) | 0.71                                  | 1.67     |
| HS-S(CoS <sub>2</sub> ) | 0.30                                  | 0.52     |

Table S2.  $\Delta G_H^*$  values for various site on 2H-MoS<sub>2</sub>, CoS<sub>2</sub> and 1T-MoS<sub>2</sub>/CoS<sub>2</sub>.

| Site                    | Gibbs free energy $\Delta G_H^*$ (eV) |          |
|-------------------------|---------------------------------------|----------|
|                         | Acidic                                | Alkaline |
| 1T-MoS <sub>2</sub> -Mo | -1.01                                 | 2.33     |
| 1T-MoS <sub>2</sub> -S  | -0.86                                 | 0.31     |
| CoS <sub>2</sub> -S     | -4.10                                 | -6.64    |
| CoS <sub>2</sub> -Co    | 0.36                                  | 0.61     |
| HS-Co                   | -0.20                                 | 0.01     |
| HS-Mo                   | -0.85                                 | -1.42    |
| HS-S(MoS <sub>2</sub> ) | -0.80                                 | -1.50    |
| HS-S(CoS <sub>2</sub> ) | -0.07                                 | -0.39    |

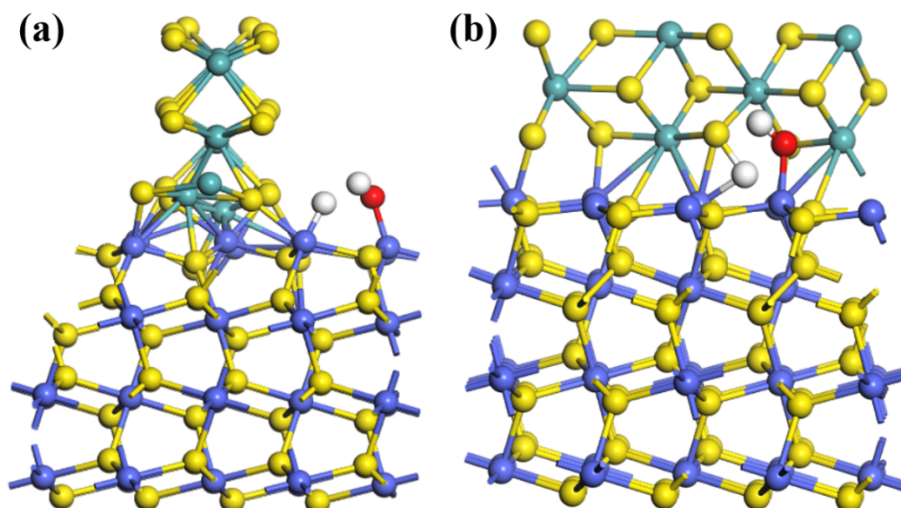

Fig. S1. The  $OH^-$  adsorption configurations on Co sites of 2H-MoS<sub>2</sub>/CoS<sub>2</sub> (a) and 1T-MoS<sub>2</sub>/CoS<sub>2</sub> (b). The cyan, yellow blue white and red balls represent Mo, S, Co H and O atoms, respectively.

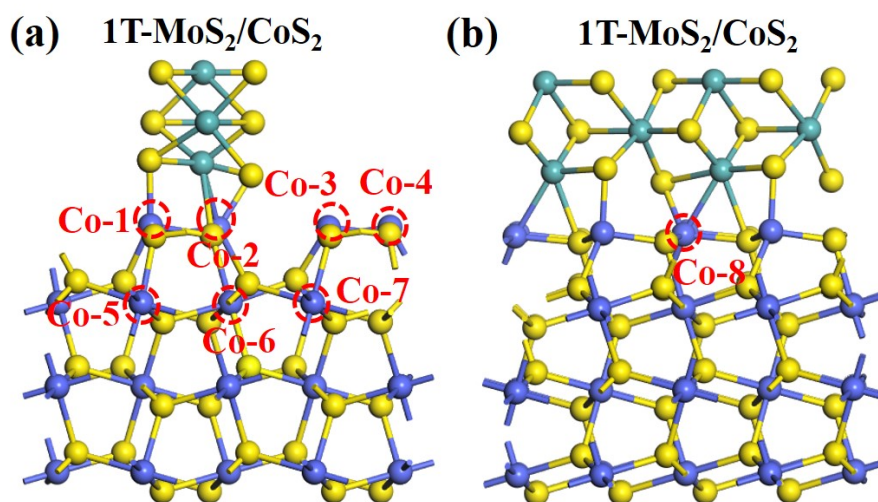

Fig. S2. The H adsorption configurations on different Co sites of 1T-MoS<sub>2</sub>/CoS<sub>2</sub> from different view angles (a) and (b). The cyan, yellow and blue balls represent Mo, S and Co atoms, respectively.

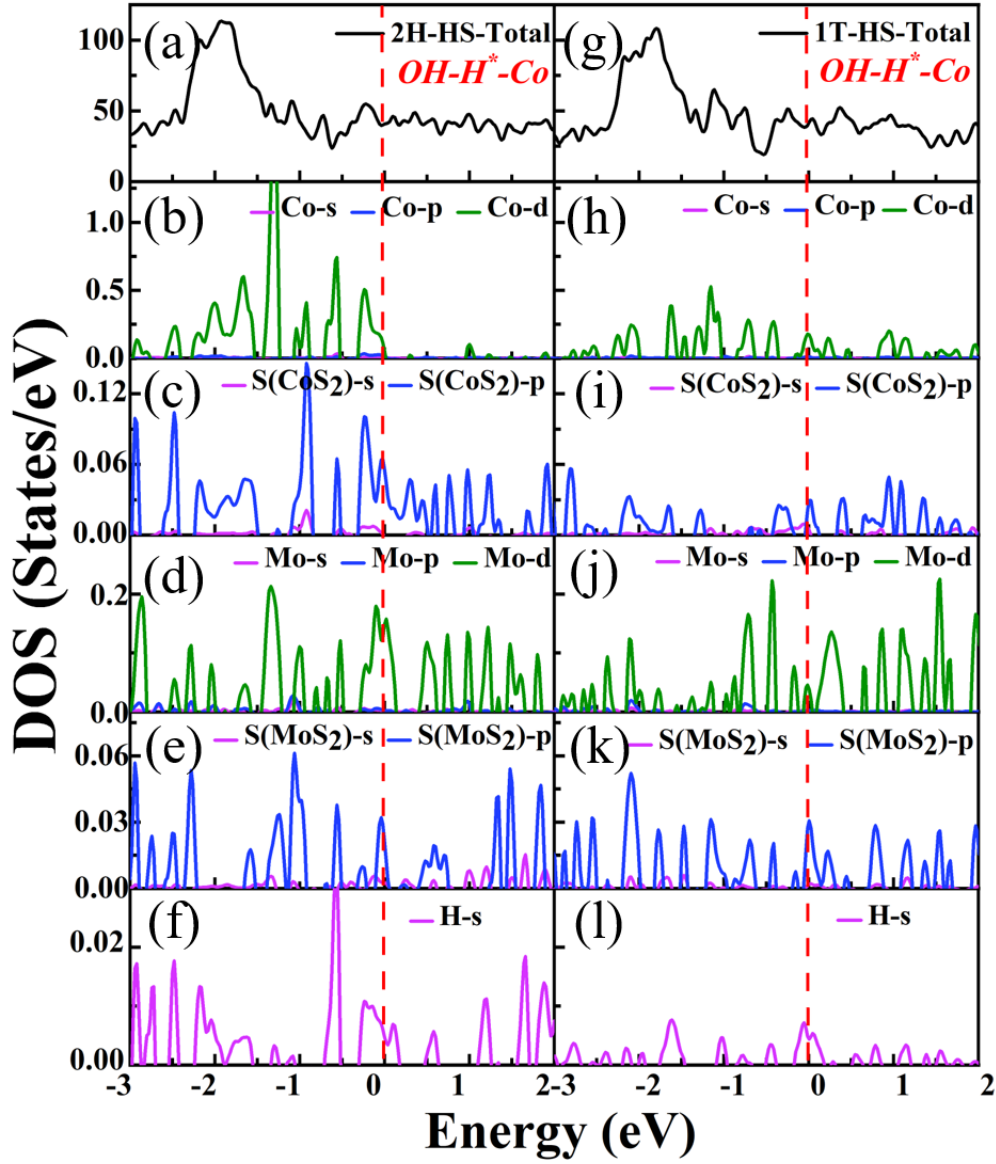

Fig. S3. DOS spectra of OH adsorption on Co sites for 2H-MoS<sub>2</sub>/CoS<sub>2</sub> (a-f) and 1T-MoS<sub>2</sub>/CoS<sub>2</sub> (g-l). (b-f) and (h-l) are the corresponding DOS spectra for Co, S(CoS<sub>2</sub>), Mo, S(MoS<sub>2</sub>) and H atoms, respectively. The purple, blue and green curves are *s*, *p* and *d* orbitals of the corresponding atoms. The  $E_F$  is indicated by a red dashed line.

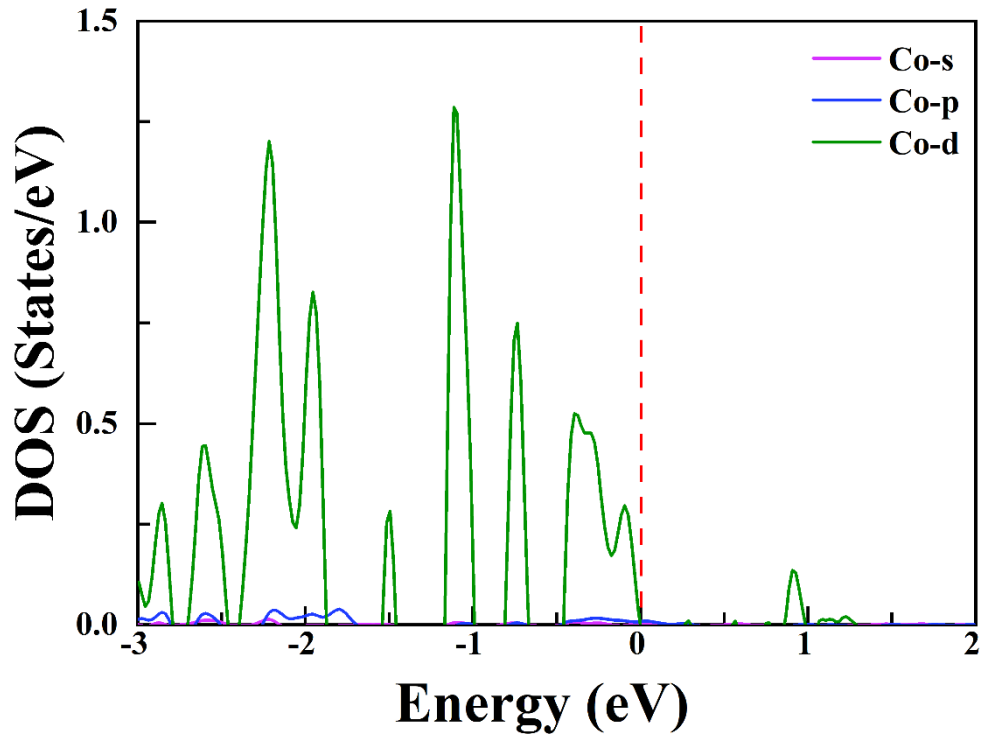

Fig. S4. DOS spectra of internal Co atom. The purple, blue and green curves are  $s$ ,  $p$  and  $d$  orbitals of the Co atom. The  $E_F$  is indicated by the red dashed line.

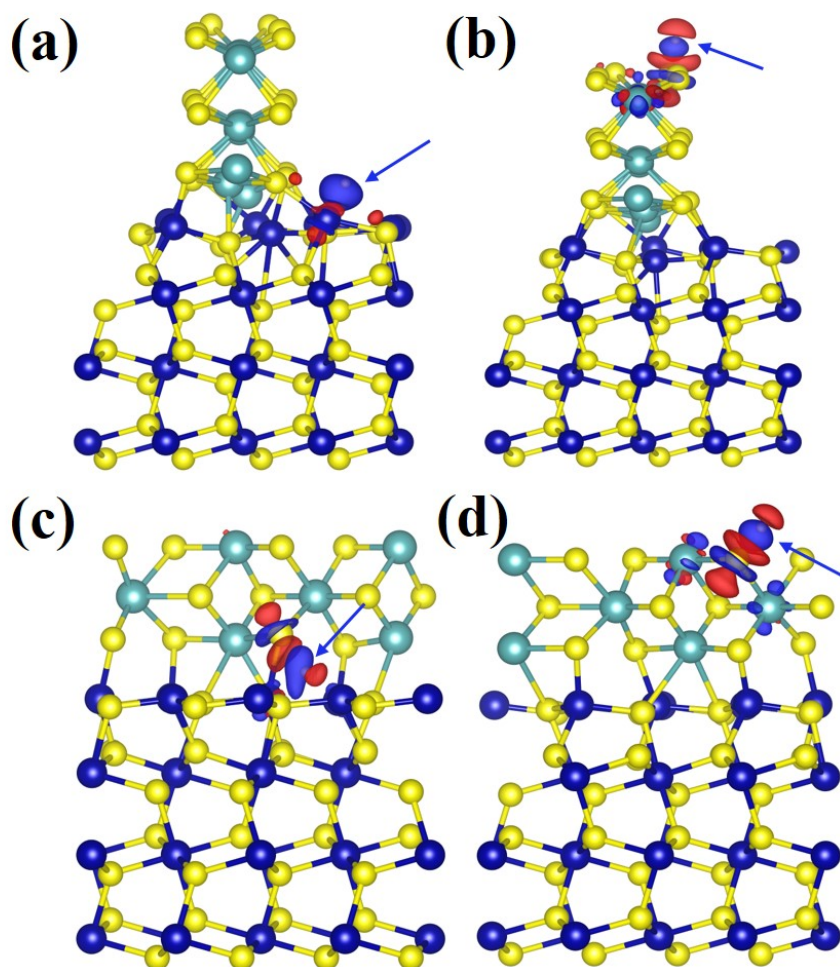

Fig. S5. Differential charge density plots. (a)-(b) are for Co and S(MoS<sub>2</sub>) site adsorption on 2H-HS. (c)-(d) are the Co and S(MoS<sub>2</sub>) adsorption configurations on 1T-HS. The blue and red region denote the electron accumulation and depletion, respectively. The isosurface value is 0.005 e Å<sup>-3</sup>. The blue arrows highlight the electron aggregation phenomenon in the corresponding configurations.



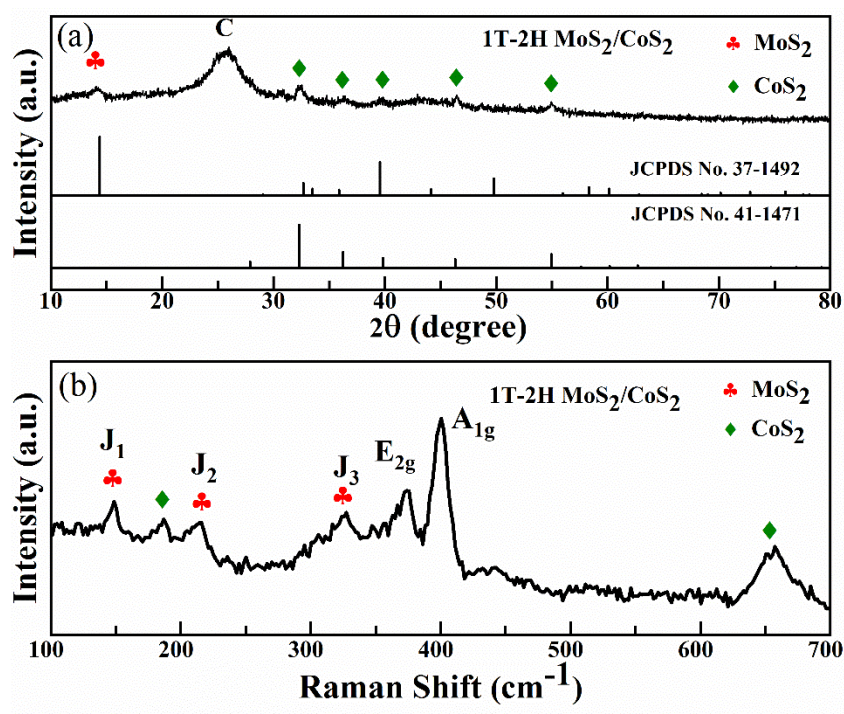

Fig. S6. (a) XRD pattern and Raman spectra (b) of 1T-2H MoS<sub>2</sub>/CoS<sub>2</sub>.

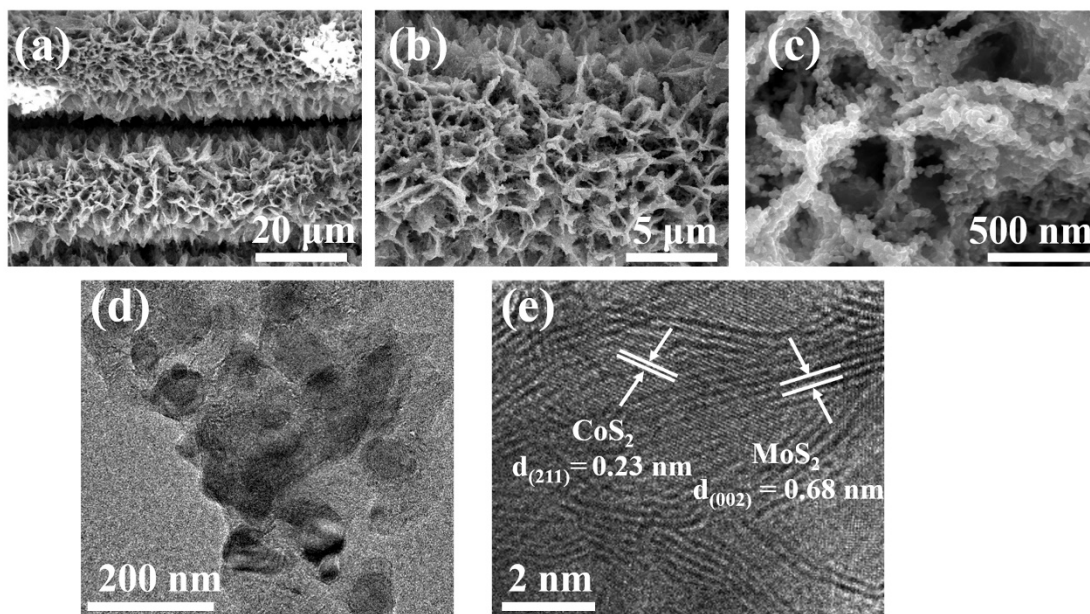

Fig. S7. SEM (a-c), TEM (d) and HRTEM (e) images of MoS<sub>2</sub>/CoS<sub>2</sub>.

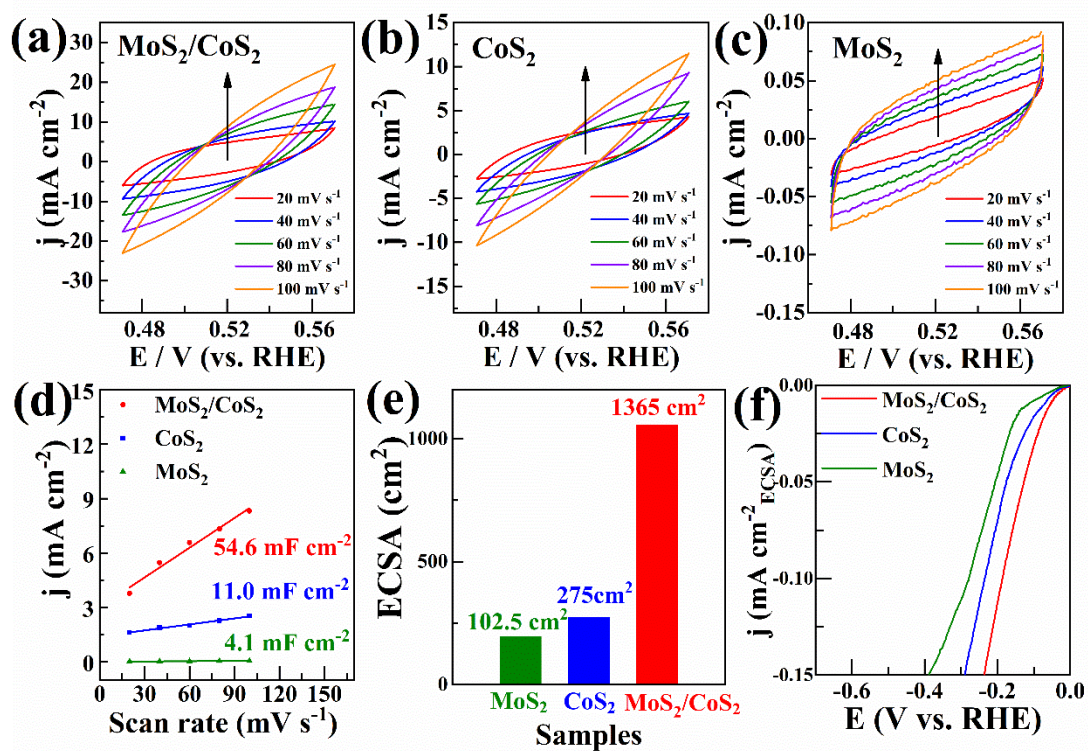

Fig. S8. (a-c) CV curves in double layer region (0.47-0.57 V vs. RHE), (d) electrochemical double-layer capacitances, (e) electrochemical active surface area and (f) specific activities normalized by ECSA for MoS<sub>2</sub>/CoS<sub>2</sub>, CoS<sub>2</sub> and MoS<sub>2</sub> at different scan rates (20~100 mV S<sup>-1</sup>), respectively.

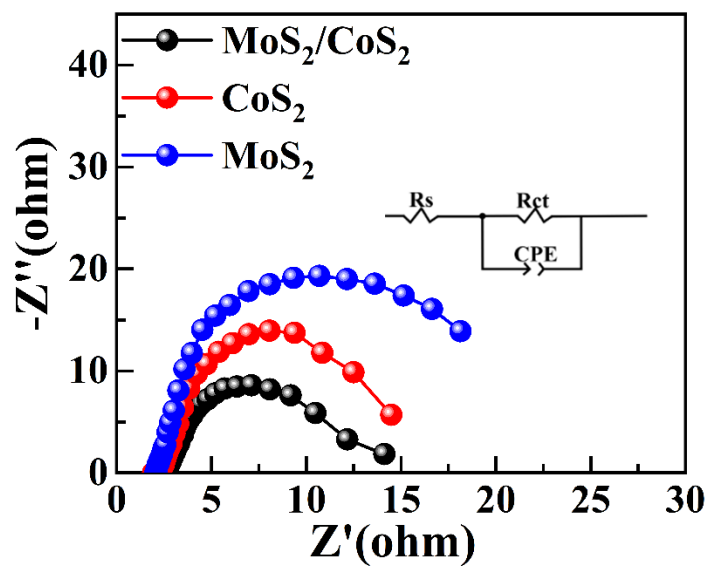

Fig. S9. Nyquist plots of MoS<sub>2</sub>/CoS<sub>2</sub>, CoS<sub>2</sub>, and MoS<sub>2</sub>.

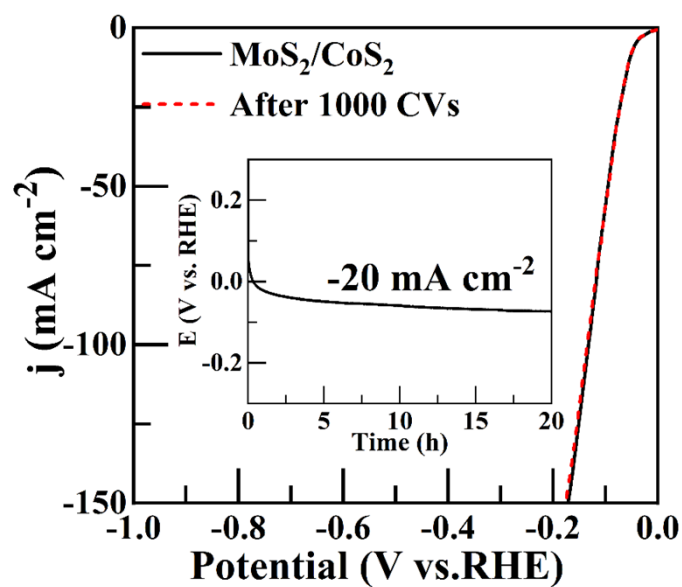

Fig. S10. Polarization curves of MoS<sub>2</sub>/CoS<sub>2</sub> before and after 1000 CV cycles. Inset shows the chronoamperometry tests of MoS<sub>2</sub>/CoS<sub>2</sub> at 20 mA cm<sup>-2</sup> for 20 h.
